# Supplementary material
Source: MDPI journal article supplement (https://www.mdpi.com/search?q=microorganisms-08-00903)
Supplement: s001 [file microorganisms-08-00903-s001.pdf]

**Table S1. Strains and genomes used in this study and relevant information pertaining to them.**

| Strain         | Other designations     | Original species designation (correspondent type strain)  | Substrate                                    | Geographic location       | Clime Zone (wild feral pop.) | Phylogeny            | Clade | Heterozygosity <sup>1</sup> | Regions <sup>2</sup> |       |       | AQY1 <sup>3</sup> | AQY2 <sup>3</sup> | RTM1 <sup>4</sup> | BIO1 Bid6 <sup>4</sup> | STA1 <sup>4</sup> | MEL <sup>1</sup> | GENOME DATA | REFERENCE   |                      |                     |                      |                      |
|----------------|------------------------|-----------------------------------------------------------|----------------------------------------------|---------------------------|------------------------------|----------------------|-------|-----------------------------|----------------------|-------|-------|-------------------|-------------------|-------------------|------------------------|-------------------|------------------|-------------|-------------|----------------------|---------------------|----------------------|----------------------|
|                |                        |                                                           |                                              |                           |                              |                      |       |                             | A                    | B     | C     |                   |                   |                   |                        |                   |                  |             |             |                      |                     |                      |                      |
| CBS 1176       |                        | <i>Saccharomyces cerevisiae</i> var. <i>orsali</i>        | Wine                                         | Switzerland               |                              | WINE - Main          | 1     | 3522                        | 15/15                |       | NF    | A88 1del          | NF                | 11bp del          | x                      | x                 | x                | x           | ERPO14555   | Peter et al. 2018    |                     |                      |                      |
| CBS 1194       |                        | <i>Saccharomyces ellipsoides</i> var. <i>thermophilus</i> | Wine                                         | Unknown                   |                              | WINE - Main          | 1     | 1597                        |                      |       | NF    | A88 1del          | NF                | 11bp del          | x                      | x                 | x                | x           | ERPO14555   | Peter et al. 2018    |                     |                      |                      |
| CBS 1479       |                        | <i>Saccharomyces ellipsoides</i> var. <i>montbensis</i>   | Wine                                         | Unknown                   |                              | WINE - Main          | 1     | 1083                        |                      |       | NF    | A88 1del          | NF                | 11bp del          | x                      | x                 | x                | x           | ERPO14555   | Peter et al. 2018    |                     |                      |                      |
| CBS 1192       |                        | <i>Saccharomyces ellipsoides</i> var. <i>alpinus</i>      | Wine                                         | Unknown                   |                              | WINE - Main          | 1     | 1183                        | 15/15                | 18/19 | NF    | A88 1del          | NF                | 11bp del          | x                      | x                 | x                | x           | ERPO14555   | Peter et al. 2018    |                     |                      |                      |
| CBS 423        | PYCC 2607              | <i>Saccharomyces chodatii</i>                             | Wine                                         | Switzerland               |                              | WINE - Main          | 1     | 4813                        | 15/15                | 18/19 | NF    | A88 1del          | NF                | 11bp del          | x                      | x                 | x                | x           | ERPO14555   | Peter et al. 2018    |                     |                      |                      |
| CBS 436        | PYCC 8195              | <i>Saccharomyces yedo</i>                                 | Sake moto                                    | Japan                     |                              | WINE - Main          | 1     | n.d.                        | 5/5                  | 18/19 | NF    | A88 1del          | NF                | 11bp del          | x                      | x                 | x                | x           | PRJEB36095  | This study           |                     |                      |                      |
| CBS 457        |                        | <i>Saccharomyces ellipsoides</i> var. <i>umbra</i>        | Grape must                                   | Italy                     |                              | WINE - Main          | 1     | 5501                        |                      | 18/19 | NF    | A88 1del          | NF                | 11bp del          | x                      | x                 | x                | x           | ERPO14555   | Peter et al. 2018    |                     |                      |                      |
| CBS 459        |                        | <i>Saccharomyces italicus</i>                             | Grape must                                   | Italy                     |                              | WINE - Main          | 1     | 1095                        |                      |       | NF    | A88 1del          | NF                | 11bp del          | x                      | x                 | x                | x           | ERPO14555   | Peter et al. 2018    |                     |                      |                      |
| PYCC 6728      | CBS 1489               | <i>Saccharomyces pulmonalis</i>                           | Sputum of tuberculosis patient               | Pavia, Italy              |                              | WINE - Main          | 1     | 1873                        |                      | 18/19 | NF    | A88 1del          | NF                | 11bp del          | x                      | x                 | x                | x           | PRJEB36095  | This study           |                     |                      |                      |
| CBS 439        |                        | <i>Saccharomyces elongatus</i>                            | Silvener grapes                              | Germany                   |                              | WINE - Main          | 1     | 1758                        | 15/15                |       | NF    | A88 1del          | NF                | 11bp del          | x                      | x                 | x                | x           | ERPO14555   | Peter et al. 2018    |                     |                      |                      |
| PYCC 4653      | CBS 1395; NRRL Y-1529  | <i>Saccharomyces ellipsoides</i>                          | Unknown                                      | Unknown                   |                              | WINE - Main          | 1     | 1988                        |                      |       | NF    | A88 1del          | NF                | 11bp del          | x                      | x                 | x                | x           | PRJEB36095  | This study           |                     |                      |                      |
| PR             |                        |                                                           | Pasteur Red                                  | Unknown                   |                              | WINE - Main          | 1     | 1715                        |                      |       | NF    | A88 1del          | NF                | 11bp del          | x                      | x                 | x                | x           | PRJEB19382  | Almeida et al. 2017  |                     |                      |                      |
| CBS 4507       |                        | <i>Saccharomyces multisporus</i>                          | Brewer's yeast, English top yeast            | Unknown                   |                              | WINE - Main          | 1     | 2995                        |                      | 17/19 | NF    | A88 1del          | NF                | 11bp del          | x                      | x                 | x                | x           | ERPO14555   | Peter et al. 2018    |                     |                      |                      |
| PYCC 6727      | CBS 1227               | <i>Saccharomyces annulatus</i>                            | Human skin infection                         | France                    |                              | WINE - Main          | 1     | 1415                        | 15/15                | 18/19 | NF    | A88 1del          | NF                | 11bp del          | x                      | x                 | x                | x           | PRJEB36095  | This study           |                     |                      |                      |
| EXF 619        |                        |                                                           | Wine must                                    | Cuber, Slovenia           |                              | WINE - Main          | 1     | 2053                        |                      | 17/19 | NF    | A88 1del          | NF                | 11bp del          | ✓                      | x                 | x                | x           | PRJEB7601   | Almeida et al. 2015  |                     |                      |                      |
| ZP 641         |                        |                                                           | Spontaneous red wine fermentation            | Castelo de Vide, Portugal |                              | WINE - Main          | 1     | 1484                        |                      |       | NF    | A88 1del          | NF                | 11bp del          | x                      | x                 | x                | x           | PRJEB7601   | Almeida et al. 2015  |                     |                      |                      |
| Lalvin BM45    | AWRI 1486              |                                                           | Commercial yeast (white wine)                | Italy                     |                              | WINE - Main          | 1     | 1280                        | 5/5                  | 2/19  | NF    | A88 1del          | NF                | 11bp del          | x                      | x                 | x                | x           | PRJEB19382  | Almeida et al. 2017  |                     |                      |                      |
| Lalvin CY-3079 | AWRI 2078              |                                                           | Commercial yeast (red wine)                  | Unknown                   |                              | WINE - Main          | 1     | 1974                        | 5/5                  | 4/19  | NF    | A88 1del          | NF                | 11bp del          | x                      | x                 | x                | x           | PRJEB19382  | Almeida et al. 2017  |                     |                      |                      |
| PYCC 8156      | CBS 1460               | <i>Saccharomyces marchalianus</i>                         | Fermenting fruit                             | Indonesia                 |                              | WINE - Main          | 1     | 1855                        |                      |       | NF    | A88 1del          | NF                | 11bp del          | x                      | x                 | x                | x           | PRJEB36095  | This study           |                     |                      |                      |
| YJM 1415       | NRRL Y-288             |                                                           | Wine                                         | France                    |                              | WINE - Main          | 1     | 1256                        | 5/5                  | 19/19 | NF    | A88 1del          | NF                | 11bp del          | x                      | x                 | x                | x           | PRJNA189914 | Strope et al. 2015   |                     |                      |                      |
| AWRI 1631      | N 96                   |                                                           | Wine                                         | Australia                 |                              | WINE - Main          | 1     | n.d.                        |                      | 8/19  | NF    | A88 1del          | NF                | 11bp del          | x                      | x                 | x                | x           | PRJNA30553  | Borneman et al. 2008 |                     |                      |                      |
| AWRI 796       | Active Dry Wine Yeast  |                                                           | Commercial wine yeast                        | South Africa              |                              | WINE - Main          | 1     | n.d.                        |                      | DUP   | F     | NF                | A88 1del          | NF                | 11bp del               | x                 | x                | x           | ✓           | NF                   | EUR                 | PRJNA48559           | Borneman et al. 2011 |
| CBS 8635       |                        | <i>Saccharomyces cereanus</i>                             | Grape must                                   | South Africa              |                              | WINE - Main          | 1     | 1552                        |                      |       | NF    | A88 1del          | NF                | 11bp del          | x                      | x                 | x                | ✓           | F           | EUR                  | ERPO14555           | Peter et al. 2018    |                      |
| YJS 8679       | ULG84F8800             | <i>Saccharomyces boulardii</i>                            | Lychee (reference strain Biocodex)           | Vietnam                   |                              | WINE - Main          | 1     | 3918                        | 5/5                  |       | NF    | A88 1del          | NF                | 11bp del          | x                      | x                 | x                | ✓           | F           | EUR                  | ERPO14555           | Peter et al. 2018    |                      |
| YJS 5881       | parental               |                                                           | Peranetrol capsule                           | Brussels, Belgium         |                              | WINE - Main          | 1     | 3848                        | 5/5                  |       | NF    | A88 1del          | NF                | 11bp del          | x                      | x                 | x                | ✓           | F           | EUR                  | ERPO14555           | Peter et al. 2018    |                      |
| YJS 5880       | ultra lev. 1127        |                                                           | UltraLevure packet                           | Paris, France             |                              | WINE - Main          | 1     | 3956                        | 5/5                  |       | NF    | A88 1del          | NF                | 11bp del          | x                      | x                 | x                | ✓           | F           | EUR                  | ERPO14555           | Peter et al. 2018    |                      |
| VL3            | B6, AWRI 1688          |                                                           | Commercial wine yeast                        | Laffort                   |                              | WINE - Main          | 1     | n.d.                        | 5/5                  | 8/19  | NF    | A88 1del          | NF                | 11bp del          | x                      | x                 | x                | ✓           | F           | EUR                  | PRJNA48565          | Borneman et al. 2011 |                      |
| A-14           |                        |                                                           | Wine conserved in amphora                    | Georgia                   |                              | WINE - Main          | 1     | 9361                        | 5/5                  | 2/19  | NF    | A88 1del          | NF                | 11bp del          | x                      | x                 | x                | ✓           | F           | EUR                  | ERPO14555           | Peter et al. 2018    |                      |
| A-16           |                        |                                                           | Wine conserved in amphora                    | Georgia                   |                              | WINE - Main          | 1     | 12369                       | 5/5                  | 2/19  | NF    | A88 1del          | NF                | 11bp del          | x                      | x                 | x                | ✓           | F           | EUR                  | ERPO14555           | Peter et al. 2018    |                      |
| A-19           |                        |                                                           | Wine conserved in amphora                    | Georgia                   |                              | WINE - Main          | 1     | 13819                       | 5/5                  | 2/19  | NF    | A88 1del          | NF                | 11bp del          | x                      | x                 | x                | ✓           | F           | EUR                  | ERPO14555           | Peter et al. 2018    |                      |
| D-4            |                        |                                                           | Wine conserved in amphora                    | Georgia                   |                              | WINE - Main          | 1     | 14899                       | 5/5                  | 2/19  | NF    | A88 1del          | NF                | 11bp del          | x                      | x                 | x                | ✓           | F           | EUR                  | ERPO14555           | Peter et al. 2018    |                      |
| CBS 5112       |                        | <i>Saccharomyces onubensis</i>                            | Grape must                                   | Spain                     |                              | WINE - Main          | 1     | 1284                        |                      |       | NF    | A88 1del          | NF                | 11bp del          | x                      | x                 | x                | ✓           | F           | EUR                  | ERPO14555           | Peter et al. 2018    |                      |
| PYCC 2613      | CBS 2909; NRRL YB-6041 | <i>Saccharomyces italicus</i> var. <i>multisporus</i>     | Faeces of man                                | Portugal                  |                              | OLIVES               | 2     | 6783                        |                      |       | NF    | A88 1del          | NF                | 11bp del          | x                      | x                 | x                | ✓           | F           | EUR                  | PRJEB30431          | Pontes et al. 2019   |                      |
| CBS 7002       | PYCC 8023              | <i>Saccharomyces hispanicus</i>                           | Alpechin                                     | Seville, Spain            |                              | OLIVES               | 2     | 2471                        |                      |       | NF    | A88 1del          | NF                | 11bp del          | x                      | x                 | x                | ✓           | F           | EUR                  | PRJEB30431          | Pontes et al. 2019   |                      |
| PYCC 6730      | VKM Y-1231             | <i>Saccharomyces olivaceus</i>                            | Olives                                       | Spain                     |                              | OLIVES               | 2     | 2965                        | 5/5                  |       | NF    | A88 1del          | NF                | 11bp del          | x                      | x                 | x                | ✓           | F           | EUR                  | PRJEB30431          | Pontes et al. 2019   |                      |
| PYCC 6732      | VKM Y-1234             | <i>Saccharomyces olivaginosus</i>                         | Alpechin                                     | Spain                     |                              | OLIVES               | 2     | 1866                        |                      |       | NF    | A88 1del          | NF                | 11bp del          | x                      | x                 | x                | ✓           | F           | EUR                  | PRJEB30431          | Pontes et al. 2019   |                      |
| PYCC 6731      | VKM Y-1232             | <i>Saccharomyces norbensis</i>                            | Alpechin                                     | Spain                     |                              | OLIVES               | 2     | 1393                        | 4/5                  |       | NF    | A88 1del          | NF                | 11bp del          | x                      | x                 | x                | ✓           | F           | EUR                  | PRJEB30431          | Pontes et al. 2019   |                      |
| PYCC 6733      | VKM Y-1235             | <i>Saccharomyces hispanicus</i>                           | Alpechin                                     | Spain                     |                              | OLIVES               | 2     | 5258                        |                      |       | NF    | A88 1del          | NF                | 11bp del          | x                      | x                 | x                | ✓           | F           | EUR                  | PRJEB30431          | Pontes et al. 2019   |                      |
| Lalvin O423    |                        |                                                           | Commercial wine yeast                        | Portugal                  |                              | WINE - PDM           | 3     | n.d.                        | 15/15                | 17/19 | 19/19 | NF                | A88 1del          | F                 | x                      | x                 | x                | ✓           | F           | EUR                  | PRJNA48561          | Borneman et al. 2011 |                      |
| PYCC 4074      |                        |                                                           | Commercial wine yeast (Fermichamp)           | Portugal                  |                              | WINE - PDM           | 3     | 2263                        | 15/15                | 5/5   |       | NF                | A88 1del          | F                 | x                      | x                 | x                | ✓           | F           | EUR                  | PRJEB19382          | Almeida et al. 2017  |                      |
| EC 1118        | Prise de Mousse        |                                                           | Industrial strain isolated from Champagne    | France                    |                              | WINE - PDM           | 3     | n.d.                        | 15/15                | 5/5   | 19/19 | NF                | A88 1del          | NF                | 11bp del               | x                 | x                | x           | ✓           | F                    | EUR                 | PRJEA37863           | Novo et al. 2009     |
| PYCC 6722      | CBS 5155; VKM Y-515    | <i>Saccharomyces probsoberus</i>                          | Wine                                         | South Armenia             |                              | WINE - PDM           | 3     | 2121                        |                      |       | NF    | A88 1del          | F                 | x                 | x                      | x                 | ✓                | F           | EUR         | PRJEB19382           | Almeida et al. 2017 |                      |                      |
| PYCC 6729      |                        |                                                           | Jerez-wine                                   | Armenia                   |                              | WINE - PDM           | 3     | 2901                        |                      |       | NF    | A88 1del          | F                 | x                 | x                      | x                 | ✓                | F           | EUR         | PRJEB19382           | Almeida et al. 2017 |                      |                      |
| S-18           |                        |                                                           | Wine conserved in amphora                    | Georgia                   |                              | WINE - PDM           | 3     | 4034                        | 5/5                  |       | NF    | A88 1del          | F                 | x                 | x                      | x                 | ✓                | F           | EUR         | ERPO14555            | Peter et al. 2018   |                      |                      |
| B-24           |                        |                                                           | Wine conserved in amphora                    | Georgia                   |                              | WINE - PDM           | 3     | 5115                        | 5/5                  | 19/19 | NF    | A88 1del          | F                 | x                 | x                      | x                 | ✓                | F           | EUR         | ERPO14555            | Peter et al. 2018   |                      |                      |
| CBS 2247       |                        | <i>Saccharomyces egypticus</i>                            | Wine                                         | South Africa              |                              | WINE - PDM           | 3     | 1547                        |                      |       | NF    | A88 1del          | F                 | x                 | x                      | x                 | ✓                | F           | EUR         | ERPO14555            | Peter et al. 2018   |                      |                      |
| CBS 4054       |                        | <i>Saccharomyces aceti</i>                                | Wine                                         | Spain                     |                              | WINE - PDM           | 3     | 1712                        |                      |       | NF    | A88 1del          | F                 | x                 | x                      | x                 | ✓                | F           | EUR         | ERPO14555            | Peter et al. 2018   |                      |                      |
| CBS 5835       |                        | <i>Saccharomyces hispanica</i>                            | Wine                                         | Spain                     |                              | WINE - PDM           | 3     | 3825                        |                      |       | NF    | A88 1del          | F                 | x                 | x                      | x                 | ✓                | F           | EUR         | ERPO14555            | Peter et al. 2018   |                      |                      |
| CBS 6006       |                        | <i>Saccharomyces gaditensis</i>                           | Wine                                         | Spain                     |                              | WINE - PDM           | 3     | 3867                        | 5/5                  | 19/19 | NF    | A88 1del          | F                 | x                 | x                      | x                 | ✓                | F           | EUR         | ERPO14555            | Peter et al. 2018   |                      |                      |
| CBS 6007       |                        | <i>Saccharomyces cordubensis</i>                          | Wine                                         | Spain                     |                              | WINE - PDM           | 3     | 1520                        |                      |       | NF    | A88 1del          | F                 | x                 | x                      | x                 | ✓                | F           | EUR         | ERPO14555            | Peter et al. 2018   |                      |                      |
| PYCC 6726      |                        |                                                           | Jerez-wine                                   | Spain                     |                              | WINE - PDM           | 3     | 4939                        |                      |       | NF    | A88 1del          | F                 | x                 | x                      | x                 | ✓                | F           | EUR         | PRJEB19382           | Almeida et al. 2017 |                      |                      |
| CLIB 1082      |                        |                                                           | Cider brewery, dry cider                     | Upper Normandy, France    |                              | CACHAÇA - BIOETHANOL | 4     | 22616                       | 15/15                | 5/5   | NF    | A88 1del          | V121M             | F                 | ✓                      | x                 | x                | ✓           | F           | EUR                  | ERPO14555           | Peter et al. 2018    |                      |
| UFMG-CM-Y030   | CAY1007                |                                                           | Cachaça (commercial strain)                  | Minas Gerais, Brazil      |                              | CACHAÇA - BIOETHANOL | 4     | 31074                       | 5/5                  |       | NF    | A88 1del          | NF                | G75del            | x                      | x                 | x                | ✓           | F           | SA                   | PRJEB24932          | Barbosa et al. 2018  |                      |
| UFMG-CM-Y630   | SC3                    |                                                           | Cachaça                                      | Santa Catarina, Brazil    |                              | CACHAÇA - BIOETHANOL | 4     | 3570                        | 5/5                  |       | F     | NF                | NF                | 11bp del          | ✓                      | x                 | x                | ✓           | F           | EUR                  | PRJEB24932          | Barbosa et al. 2018  |                      |
| CBS 7959       |                        |                                                           | Factory producing ethanol (sugar cane syrup) | Sao Paulo, Brazil         |                              | CACHAÇA - BIOETHANOL | 4     | 2365                        | 5/5                  |       | NF    | A88 1del          | NF                | 11bp del          | ✓                      | x                 | x                | ✓           | F           | EUR                  | ERPO14555           | Peter et al. 2018    |                      |
| UFMG-CM-Y633   | T09                    |                                                           | Cachaça                                      | Tocantins, Brazil         |                              | CACHAÇA - BIOETHANOL | 4     | 6833                        |                      |       | NF    | A88 1del          | F                 | ✓                 | x                      | x                 | ✓                | F           | EUR         | PRJEB24932           | Barbosa et al. 2018 |                      |                      |
| UFMG-CM-Y634   | TOC 1301               |                                                           | Cachaça                                      | Tocantins, Brazil         |                              | CACHAÇA - BIOETHANOL | 4     | 21251                       | 5/5                  |       | NF    | A88 1del          | NF                | 11bp del          | ✓                      | x                 | x                | ✓           | F           | EUR                  | PRJEB24932          | Barbosa et al. 2018  |                      |
| BG-1           |                        |                                                           | Bioethanol-producing strain from sugar cane  | Brazil                    |                              | CACHAÇA - BIOETHANOL | 4     | n.d.                        | 4/5                  |       | NF    | A88 1del          | NF                | 20bp ins          | x                      | x                 | x                | ✓           | F           | EUR                  | PRJNA352845         | Coutoune 2017        |                      |
| M.9.1          |                        |                                                           | Cachaça                                      | Brazil                    |                              | CACHAÇA - BIOETHANOL | 4     | 26964                       | 5/5                  |       | NF    | A88 1del          | V121M             | NF                | 11bp del               | ✓                 | x                | x           | ✓           | F                    | EUR                 | ERPO14555            | Peter et al. 2018    |
| M1.1           |                        |                                                           | Cachaça                                      | Brazil                    |                              | CACHAÇA - BIOETHANOL | 4     | 23740                       | 5/5                  |       | NF    | A88 1del          | NF                | 11bp del          | ✓                      | x                 | x                | ✓           | F           | EUR                  | ERPO14555           | Peter et al. 2018    |                      |
| BE063          |                        |                                                           | Beer                                         | England                   |                              | BEER                 |       |                             |                      |       |       |                   |                   |                   |                        |                   |                  |             |             |                      |                     |                      |                      |



|                     |                       |                                                               |                                                         |                                                           |  |                  |                           |       |       |       |    |         |          |        |          |       |   |     |      |   |   |      |             |                                   |                                   |                   |
|---------------------|-----------------------|---------------------------------------------------------------|---------------------------------------------------------|-----------------------------------------------------------|--|------------------|---------------------------|-------|-------|-------|----|---------|----------|--------|----------|-------|---|-----|------|---|---|------|-------------|-----------------------------------|-----------------------------------|-------------------|
| COJ2.4              |                       |                                                               | Fermented rice                                          | Shaoying, Zhejiang                                        |  | CHN FERMENTATION | 12                        | 540   |       |       | NF | V121M   | A522nd   | NF     | G259d    |       | x | ✓   | x    | x |   |      | PRJNA396809 | Duan et al. 2018                  |                                   |                   |
| HQ1.1               |                       |                                                               | Huangjiu (rice wine) starter with fermented monascus    | Gutan, Fujian                                             |  | CHN FERMENTATION | 12                        | 3753  |       |       | NF | V121M   | A863del  | NF     | G259d    |       | x | ✓   | x    | x | F | AS I | PRJNA396809 | Duan et al. 2018                  |                                   |                   |
| GZLJ3.19            |                       |                                                               | Fermented sorghum grain                                 | Changshun, Guizhou                                        |  | CHN FERMENTATION | 12                        | 3807  |       |       | NF | V121M   | A822nd   | NF     | G259d    |       | x | ✓   | x    | x |   |      | PRJNA396809 | Duan et al. 2018                  |                                   |                   |
| HLJ25               |                       |                                                               | Fermented sorghum grain                                 | Qiqihar, Heilongjiang                                     |  | CHN FERMENTATION | 12                        | 5146  |       |       | NF | V121M   | A822nd   | F      | G259d    |       | x | ✓   | x    | x | F | AS I | PRJNA396809 | Duan et al. 2018                  |                                   |                   |
| JB3                 |                       |                                                               | Fermenting dough                                        | Chengcheng, Shanxi                                        |  | CHN FERMENTATION | 12                        | 3302  |       |       | NF | V121M   |          | NF     | G259d    |       | x | ✓   | x    | x | F | AS I | PRJNA396809 | Duan et al. 2018                  |                                   |                   |
| JT49.1              |                       |                                                               | Dry fermented dough                                     | Zhouzhi, Shanxi                                           |  | CHN FERMENTATION | 12                        | 7371  |       |       | NF | V121M   | A822nd   | NF     | G259d    |       | x | ✓   | x    | x |   |      | PRJNA396809 | Duan et al. 2018                  |                                   |                   |
| LJQ13.C7            |                       |                                                               | Fermenting dough                                        | Yanan, Shanxi                                             |  | CHN FERMENTATION | 12                        | 3044  |       |       | NF | V121M   |          | NF     | G259d    |       | x | ✓   | x    | x |   |      | PRJNA396809 | Duan et al. 2018                  |                                   |                   |
| CBS 1544            | PYCC 4654             | <i>Saccharomyces kudriavzevii</i>                             | Fermenting fruit juice                                  | Netherlands                                               |  |                  |                           | 5165  | 5%    | 19/19 | NF | A881del |          | NF     | 11bp del |       | x | ✓   | x    | x |   |      | PRJEB36095  | This study                        |                                   |                   |
| MTF 2546            |                       |                                                               | Cocoa bean fermentation                                 | West Africa                                               |  | COCOA            | 13                        | 14517 |       |       | 5% | NF      | A881del  |        | G259d    |       | x | ✓   | x    | x |   |      | ERPD14555   | Peter et al. 2018                 |                                   |                   |
| MTF 2548            |                       |                                                               | Cocoa bean fermentation                                 | West Africa                                               |  | COCOA            | 13                        | 23290 |       | 5%    | NF | A881del |          | F      | G259d    |       | x | ✓   | x    | x |   |      | ERPD14555   | Peter et al. 2018                 |                                   |                   |
| MTF 2551            |                       |                                                               | Cocoa bean fermentation                                 | West Africa                                               |  | COCOA            | 13                        | 21583 |       | 5%    | NF | A881del |          | F      | G259d    |       | x | ✓   | x    | x |   |      | ERPD14555   | Peter et al. 2018                 |                                   |                   |
| BJ10                |                       |                                                               | Bark of <i>Ulmus</i> sp., secondary forest              | Wuling Mountain, Beijing                                  |  | TEMP             | CHN VIII                  | 14    | 2086  |       | 3% | NF      | A891del  |        | G259d    |       | x | ✓   | x    | x |   |      | PRJNA396809 | Duan et al. 2018                  |                                   |                   |
| BJ2                 |                       |                                                               | Apple, orchard                                          | Shunyi, Beijing                                           |  | TEMP             | CHN VIII                  | 14    | 2647  |       | 5% |         |          | F      | G259d    |       | x | ✓   | x    | x |   |      | PRJNA396809 | Duan et al. 2018                  |                                   |                   |
| CBS 1598            |                       |                                                               | Sake moto                                               | Nakazawa, Japan                                           |  |                  | SAKE                      | 15    | 3517  |       |    | NF      | V121M    |        | NF       | G259d |   | ✓   | ✓    | x | x |      | ERS1108639  | Goncalves et al. 2016             |                                   |                   |
| CBS 435             | PYCC 8194             | <i>Saccharomyces kluyveri</i>                                 | Sake moto                                               | Nakazawa, Japan                                           |  |                  | SAKE                      | 15    | 4906  |       |    | NF      | V121M    |        | NF       | G259d |   | ✓   | ✓    | x | x |      | ERS1108637  | Goncalves et al. 2016             |                                   |                   |
| UC 5                | UCD612                |                                                               | Sake sake                                               | Kurashi, Japan                                            |  |                  | SAKE                      | 15    | n.d.  |       |    | NF      | V121M    |        | NF       | G259d |   | x   | ✓    | x | x |      | PRJNA60197  | Justin Fay, Washington University |                                   |                   |
| Kyokai-no-7         | K7                    |                                                               | Japanese sake brewer                                    | Japan                                                     |  |                  | SAKE                      | 15    | n.d.  |       |    | NF      | V121M    | A822nd | NF       | G259d |   | x   | TRIP | x | x |      |             | AKAO45827                         | Akao et al. 2011                  |                   |
| CBS 1508            | PYCC 5182             | <i>Saccharomyces carlsbergensis</i> var. <i>mandschuricus</i> | Starter for sorghum brandy                              | Unknown                                                   |  |                  | SAKE                      | 15    | 1898  |       |    | NF      | V121M    | A822nd | NF       | G259d |   | ✓   | ✓    | x | x | F    | AS I        | ERPD14555                         | Peter et al. 2018                 |                   |
| CBS 440             |                       | <i>Saccharomyces fermentosus</i>                              | Molasses                                                | Taiwan                                                    |  |                  | SAKE                      | 15    | 2410  |       | 5% | NF      | A891del  |        | NF       | G259d |   | ✓   | ✓    | x | x |      | ERPD14555   | Peter et al. 2018                 |                                   |                   |
| Y12                 | NRRL Y-12663, CBS 400 |                                                               | Fermentation (palm wine)                                | Ivory Coast                                               |  |                  | SAKE                      | 15    | 15534 |       |    | NF      | V121M    |        | NF       | G259d |   | ✓   | ✓    | x | x |      | SGRP2       | Bergstrom, A. et al. 2014         |                                   |                   |
| CLIB 1414           |                       |                                                               | Rice wine                                               | Laos                                                      |  |                  | SAKE                      | 15    | 11848 |       |    | NF      | V121M    | A822nd | NF       | G259d |   | ✓   | x    | x | x |      | ERPD14555   | Peter et al. 2018                 |                                   |                   |
| MTJZ1               |                       |                                                               | Fermented sorghum grain                                 | Renhui, Guizhou, China                                    |  |                  | SAKE                      | 15    | 2515  |       |    | NF      | V121M    |        | NF       | G259d |   | ✓   | ✓    | x | x | F    | AS I        | PRJNA396809                       | Duan et al. 2018                  |                   |
| YJSH1               |                       |                                                               | Bioethanol-producing strain                             | China                                                     |  |                  | SAKE                      | 15    | 3084  |       |    | NF      | V121M    |        | NF       | G259d |   | x   | ✓    | x | x | F    | AS I        | PRJNA72403                        | Zheng, et al. 2012                |                   |
| NRRL Y-12844        |                       |                                                               | Budod (rice-based starter)                              | Philippines                                               |  |                  | SAKE                      | 15    | 10363 |       |    | NF      | V121M    |        | NF       | G259d |   | ✓   | ✓    | x | x |      | ERS1108645  | Goncalves et al. 2016             |                                   |                   |
| NRRL Y-7327         | PYCC 8032             |                                                               | Tibetan beer starter                                    | H. Douglas, University of Washington, Seattle, Washington |  |                  | SAKE                      | 15    | 31305 |       |    | NF      | V121M    | G262nd | NF       | G259d |   | ✓   | ✓    | x | x |      | PRJEB36095  | This study                        |                                   |                   |
| NRRL Y-6297         | PYCC 8030             |                                                               | Coconut tuba (palm wine)                                | Hipollo, NIST, Manila, Philippines                        |  | TROP             | PHILIPPINES               | 16    | 3044  |       |    | NF      | V121M    |        | NF       | G259d |   | ✓   | ✓    | x | x |      | PRJEB36095  | This study                        |                                   |                   |
| YJM 1479            | NRRL Y-6297           |                                                               | Coconut tuba (palm wine)                                | Philippines                                               |  | TROP             | PHILIPPINES               | 16    | 3264  |       |    | NF      | V121M    |        | NF       | G259d |   | ✓   | ✓    | x | x |      | PRJNA189929 | Strope et al. 2015                |                                   |                   |
| NRRL YB-0083        |                       |                                                               | Coconut sap                                             | Philippines                                               |  | TROP             | PHILIPPINES               | 16    | n.d.  |       |    | NF      | V121M    |        | NF       | G259d |   | ✓   | ✓    | x | x |      | PRJEB36095  | This study                        |                                   |                   |
| YJM 1400            | NRRL YB-0081          |                                                               | Guaava (fruit)                                          | Philippines                                               |  | TROP             | PHILIPPINES               | 16    | 2960  |       |    | NF      | V121M    |        | NF       | G259d |   | ✓   | ✓    | x | x |      | PRJNA189911 | Strope et al. 2015                |                                   |                   |
| CBS 1576            |                       |                                                               | Exudate of <i>Arenaria</i> sp. (palm tree)              | Celebes, Sulawesi, Indonesia                              |  | TROP             | PHILIPPINES               | 16    | 2576  |       |    | NF      | V121M    |        | F        | G259d |   | ✓   | ✓    | x | x |      | ERPD14555   | Peter et al. 2018                 |                                   |                   |
| NRRL Y-5508         | PYCC 8029             |                                                               | Coconut pod                                             | Arguelles, Manila, Philippines                            |  | TROP             | PHILIPPINES               | 16    | 19036 |       |    | NF      | V121M    |        | F        | G259d |   | ✓   | ✓    | x | x |      | PRJEB36095  | This study                        |                                   |                   |
| DJ66                |                       |                                                               | Palm wine                                               | Yoboki, Djibouti                                          |  | TROP             | PHILIPPINES               | 16    | 19012 |       |    | NF      | T178 del | A822nd | F        | G259d |   | DUP | ✓    | ✓ | x | x    | NF          | AF II                             | ERPD14555                         | Peter et al. 2018 |
| SBBM-30-2D          |                       |                                                               | Phloem sap of <i>Caryota urens</i> (Toddy palm)         | Sri Lanka                                                 |  | TROP             | PHILIPPINES               | 16    | 3172  |       |    | NF      | V121M    |        | F        | G259d |   | ✓   | ✓    | x | x | F    | AS I        | ERPD14555                         | Peter et al. 2018                 |                   |
| CBS 2992            |                       |                                                               | Palm wine                                               | Pakistan                                                  |  | TROP             | PHILIPPINES               | 16    | 2405  |       |    | NF      | V121M    | A822nd | NF       | G259d |   | ✓   | ✓    | x | x |      | PRJEB36095  | This study                        |                                   |                   |
| CBS 3000            |                       |                                                               | Palm wine                                               | Pakistan                                                  |  | TROP             | PHILIPPINES               | 16    | 2325  |       |    | NF      | V121M    |        | NF       | G259d |   | ✓   | ✓    | x | x |      | PRJEB36095  | This study                        |                                   |                   |
| SDO 3e1             |                       |                                                               | Oak                                                     | North Carolina, USA                                       |  | TROP             | NA & JP - CHL VIIII - FER | 17    | 3693  |       |    | F       | F        |        | F        | G259d |   | x   | ✓    | x | x |      | PRJEB7601   | Almeida et al. 2015               |                                   |                   |
| YPS 1009            |                       |                                                               | Oak exudate                                             | New Jersey, USA                                           |  | TEMP             | NA & JP - CHL VIIII - FER | 17    | 2650  |       |    | F       | F        |        | F        | G259d |   | x   | ✓    | x | x |      | PRJNA60223  | Justin Fay, Washington University |                                   |                   |
| YPS 163             |                       |                                                               | <i>Quercus rubra</i>                                    | Pennsylvania, USA                                         |  | TEMP             | NA & JP - CHL VIIII - FER | 17    | 2873  |       |    | F       | F        |        | F        | G259d |   | x   | ✓    | x | x |      | PRJNA28813  | Doniger et al. 2008               |                                   |                   |
| ZP 651              |                       |                                                               | <i>Quercus acutissima</i>                               | Chiba Prefecture, Japan                                   |  | TEMP             | NA & JP - CHL VIIII - FER | 17    | 3623  |       |    | F       | F        |        | F        | G259d |   | x   | ✓    | x | x |      | PRJEB7601   | Almeida et al. 2015               |                                   |                   |
| Y. 03-30-1-1-1, (1) |                       |                                                               | <i>Chaetodes pectinatis</i> (male) - <i>Corydalidae</i> | Louisiana, USA                                            |  | TEMP             | NA & JP - CHL VIIII - FER | 17    | 2762  |       |    | F       | F        |        | F        | G259d |   | x   | ✓    | x | x |      | ERPD14555   | Peter et al. 2018                 |                                   |                   |
| ZP 652              |                       |                                                               | <i>Quercus acutissima</i>                               | Chiba Prefecture, Japan                                   |  | TEMP             | NA & JP - CHL VIIII - FER | 17    | 3699  |       |    | F       | F        |        | F        | G259d |   | x   | ✓    | x | x |      | PRJEB7601   | Almeida et al. 2015               |                                   |                   |
| ZP 779              |                       |                                                               | <i>Quercus acutissima</i>                               | Hirusen highland, Okayama Prefecture, Japan               |  | TEMP             | NA & JP - CHL VIIII - FER | 17    | 3509  |       |    | F       | F        |        | F        | G259d |   | x   | ✓    | x | x |      | PRJEB7601   | Almeida et al. 2015               |                                   |                   |
| ZP 781              |                       |                                                               | <i>Quercus serrata</i>                                  | Hirusen highland, Okayama Prefecture, Japan               |  | TEMP             | NA & JP - CHL VIIII - FER | 17    | 3333  |       | 3% | F       | F        |        | F        | G259d |   | x   | ✓    | x | x |      | PRJEB7601   | Almeida et al. 2015               |                                   |                   |
| BJ28                |                       |                                                               | Bark of <i>Castanea</i> sp., secondary forest           | Wuling Mountain, Beijing                                  |  | TEMP             | NA & JP - CHL VIIII - FER | 17    | 8648  |       | 3% | F       | F        |        | F        | G259d |   | x   | ✓    | x | x |      | PRJNA396809 | Duan et al. 2018                  |                                   |                   |
| FJ12                |                       |                                                               | Peach from a market                                     | Wuyi Mountain, Fujian                                     |  | TEMP             | NA & JP - CHL VIIII - FER | 17    | 3074  |       |    | F       | F        |        | F        | G259d |   | x   | ✓    | x | x |      | PRJNA396809 | Duan et al. 2018                  |                                   |                   |
| HL2                 |                       |                                                               | Bark of <i>Quercus mongolica</i> , secondary forest     | Jingbo lake, Heilongjiang                                 |  | TEMP             | NA & JP - CHL VIIII - FER | 17    | 2803  |       |    | F       | F        |        | F        | G259d |   | x   | ✓    | x | x |      | PRJNA396809 | Duan et al. 2018                  |                                   |                   |
| N163.01-5A          |                       |                                                               | Exudate of <i>Quercus mongolica</i>                     | Botanical garden, Blagoveshchensk, Russia                 |  | TEMP             | NA & JP - CHL VIIII - FER | 17    | 3049  |       |    | F       | F        |        | F        | G259d |   | x   | ✓    | x | x |      | ERPD14555   | Peter et al. 2018                 |                                   |                   |
| N3.00-7A            |                       |                                                               | Grape berries of wild <i>Vitis amurensis</i>            | Botanical garden, Blagoveshchensk, Russia                 |  | TEMP             | NA & JP - CHL VIIII - FER | 17    | 2432  |       |    | F       | F        |        | F        | G259d |   | x   | ✓    | x | x |      | ERPD14555   | Peter et al. 2018                 |                                   |                   |
| N159.01-2B          |                       |                                                               | Exudate of <i>Quercus mongolica</i>                     | Botanical garden, Blagoveshchensk, Russia                 |  | TEMP             | NA & JP - CHL VIIII - FER | 17    | 2863  |       |    | F       | F        |        | F        | G259d |   | x   | ✓    | x | x |      | ERPD14555   | Peter et al. 2018                 |                                   |                   |
| SD1                 |                       |                                                               | Persimmon, planted tree                                 | Anqiu, Shandong                                           |  | TEMP             | CHN VI / CHN VII          | 18    | 2095  |       |    | F       | F        |        | F        | G259d |   | x   | ✓    | x | x |      | PRJNA396809 | Duan et al. 2018                  |                                   |                   |
| SX10                |                       |                                                               | Persimmon, planted tree                                 | Qinling Mountain, Shaanxi                                 |  | TEMP             | CHN VI / CHN VII          | 18    | 2509  |       |    | F       | F        |        | F        | G259d |   | x   | ✓    | x | x |      | PRJNA396809 | Duan et al. 2018                  |                                   |                   |
| XJ1                 |                       |                                                               | Soil, orchard                                           | Xinjiang                                                  |  | TEMP             | CHN VI / CHN VII          | 18    | 2880  |       |    | F       | F        |        | F        | G259d |   | x   | ✓    | x | x |      | PRJNA396809 | Duan et al. 2018                  |                                   |                   |
| CBS 403             | PYCC 4571             | <i>Saccharomyces lindneri</i>                                 | Ginger beer from <i>Zingiber officinale</i>             | West Africa                                               |  |                  | WEST AFRICA               | 19    | 2031  |       |    | NF      | A881del  |        | F        | G259d |   | ✓   | ✓    | x | x | NF   | AF II       | PRJEB36095                        | Peter et al. 2018                 |                   |
| YJM 1439            | NCYC 110              |                                                               | Ginger beer from <i>Zingiber officinale</i>             | West Africa                                               |  |                  | WEST AFRICA               | 19    | 2129  |       |    | F       | F        |        | F        | G259d |   | ✓   | ✓    | x | x | NF   | AF II       | PRJEB36095                        | Peter et al. 2018                 |                   |
| PYCC8489            | NRRL Y-12633, CBS 400 | <i>Saccharomyces chevalieri</i>                               | Palm wine from <i>Elaeis guineensis</i>                 | Ivory Coast                                               |  |                  | WEST AFRICA               | 19    | 3572  |       |    | NF      | A881del  |        | F        | G259d |   | ✓   | ✓    | x | x | NF   | AF II       | PRJEB36095                        | This study                        |                   |
| YJM 1248            | NRRL Y-1546           |                                                               | Bill wine from <i>Ostebeckia grandiflora</i>            | West Africa                                               |  |                  | WEST AFRICA               | 19    | 2600  |       |    | NF      | A881del  |        | F        | G259d |   | ✓   | ✓    | x | x | NF   | AF II       | PRJNA189888                       | Strope et al. 2015                |                   |
| PW5                 |                       |                                                               | Raghaia palm wine                                       | Abia, Abia state, Nigeria                                 |  |                  | WEST AFRICA               | 19    | 1175  |       |    | NF      | A881del  |        | F        | G259d |   | ✓   | ✓    | x | x | NF   | AF II       | PRJNA60181                        | Justin Fay, Washington University |                   |
| YJM 195             | NCYC 762              |                                                               | Palm wine                                               | Nigeria                                                   |  |                  | WEST AFRICA               | 19    | 2977  |       |    | NF      | A881del  |        | F        | G259d |   | ✓   | ✓    | x | x |      | PRJNA189849 | Strope et al. 2015                |                                   |                   |
| CBS 7903            | NCYC 761              |                                                               | Palm wine                                               | Nigeria                                                   |  |                  | WEST AFRICA               | 19    | 2737  |       |    | NF      | A881del  |        | F</      |       |   |     |      |   |   |      |             |                                   |                                   |                   |

|          |  |                                                |                                             |      |        |    |      |  |  |   |  |   |  |   |   |   |   |   |             |                   |                  |
|----------|--|------------------------------------------------|---------------------------------------------|------|--------|----|------|--|--|---|--|---|--|---|---|---|---|---|-------------|-------------------|------------------|
| BJ14     |  | Forest soil, secondary forest                  | Wuling Mountain, Beijing                    | TEMP | CHN IV | 24 | 2922 |  |  | F |  | F |  | x | x | x | x |   | PRJNA396809 | Duan et al. 2018  |                  |
| BJ6      |  | Persimmon                                      | Changping, Beijing, China                   | TEMP | CHN IV | 24 | 3068 |  |  | F |  | F |  | x | x | x | x |   | ERP014555   | Peter et al. 2018 |                  |
| HN2      |  | Rotten wood, primeval forest                   | Diaolu Mountain, Hainan province, China     | TROP | CHN I  | 25 | 3283 |  |  | F |  | F |  | x | ✓ | x | ✓ | F | AS I        | PRJNA396809       | Duan et al. 2018 |
| HN6      |  | Rotten wood, primeval forest                   | Wuzhi Mountain, Hainan province, China      | TROP | CHN I  | 25 | 2780 |  |  | F |  | F |  | x | ✓ | x | x |   | ERP014555   | Peter et al. 2018 |                  |
| JXXY16.1 |  | Bark, primeval forest                          | Xiangyuan, Shanongia, Hubei province, China | TEMP | CHN IX | 26 | 1234 |  |  | F |  | F |  | x | ✓ | x | x |   | PRJNA396809 | Duan et al. 2018  |                  |
| XXY30L.2 |  | Bark, primeval forest                          | Xiangyuan, Shanongia, Hubei province, China | TEMP | CHN IX | 26 | 3191 |  |  | F |  | F |  | x | ✓ | x | x |   | PRJNA396809 | Duan et al. 2018  |                  |
| XXY30L.4 |  | Bark, primeval forest                          | Xiangyuan, Shanongia, Hubei province, China | TEMP | CHN IX | 26 | 992  |  |  | F |  | F |  | x | ✓ | x | x |   | PRJNA396809 | Duan et al. 2018  |                  |
| SX3      |  | Bark from <i>Carya</i> sp.                     | Qinling Mountain, Shaanxi province, China   | TEMP | CHN II | 27 | 2833 |  |  | F |  | F |  | x | x | x | x |   | ERP014555   | Peter et al. 2018 |                  |
| SX1      |  | Persimmon, planted tree                        | Qinling Mountain, Shaanxi province, China   | TEMP | CHN II | 27 | 2509 |  |  | F |  | F |  | x | x | x | x |   | ERP014555   | Peter et al. 2018 |                  |
| SX8      |  | Bark of <i>Quercus fabri</i> , primeval forest | Qinling Mountain, Shaanxi province, China   | TEMP | CHN II | 27 | 2602 |  |  | F |  | F |  | x | x | x | x |   | PRJNA396809 | Duan et al. 2018  |                  |

<sup>1</sup> Count of heterozygous sites across the genome. Values higher than 20,000 are highlighted.  
<sup>2</sup> Three genomic regions horizontally transferred from non-*Saccharomyces* yeasts (Novo et al. 2009) that encompass genes potentially relevant for the winemaking process.  
<sup>3</sup> Aquaporins (encoded by *AOY1* and *AOY2*) are membrane water channels that facilitate the transport of water in and out of the cell. Their inactivation is viewed as a consequence of domestication.  
<sup>4</sup> Subtelomeric gene associated with the locus of sucrose utilization that provides resistance to inhibitory compounds present in molasses.  
<sup>5</sup> These genes encode enzymes involved in the synthesis of biotin and were originally found in strains used in saline fermentation.  
<sup>6</sup> Chimeric gene that gives rise to an extra-cellular glucosylase that allows the conversion of soluble starch and dextrans into fermentable sugars.  
<sup>7</sup> Polymorphic genes that encode an α-galactosidase that hydrolyses melibiose.

References:  
Arao et al. 2011. Whole-genome sequencing of sake yeast *Saccharomyces cerevisiae*. *Kyokai no. 7*. DNA Res. 18, 423-434.  
Almeida et al. 2015. A population genomic insight into the Mediterranean origins of wine yeast domestication. *Mol. Ecol.* 24, 5412-5427.  
Almeida et al. 2017. Adaptive divergence in wine yeasts and their wild relatives suggests a prominent role for introgressions and rapid evolution at noncoding sites. *Mol. Ecol.* 26, 2167-2182.  
Barbosa et al. 2016. Evidence of natural hybridization in Brazilian wild lineages of *Saccharomyces cerevisiae*. *GBE*. 8:317-329.  
Barbosa et al. 2018. Multiple rounds of artificial selection promote *microbe secondary domestication* – the case of cachapa yeasts. *GBE* 10, 1939-1955.  
Bergström et al. 2014. A high-definition view of functional genetic variation from natural yeast genomes. *Mol Biol Evol* 31, 872-888.  
Bornerman et al. 2008. Comparative genome analysis of a *Saccharomyces cerevisiae* wine strain. *FEMS Yeast Res.* 8, 1185-1195.  
Bornerman et al. 2011. Whole-genome comparison reveals novel genetic elements that characterize the genome of industrial strains of *Saccharomyces cerevisiae*. *PLoS Genet.* 7, E1001287.  
Coutouné et al. 2017. Draft genome sequence of *Saccharomyces cerevisiae* Barra Grande (BG-1), a Brazilian industrial bioethanol-producing strain. *Genome Announc.* 5:e00111-17.  
Doniger et al. 2008. A catalog of neutral and deleterious polymorphism in yeast. *PLoS Genet* 4, e1000183.  
Duan et al. 2018. The origin and adaptive evolution of domesticated populations of yeast from Far East Asia. *Nature communications.* 9, 1: 2690.  
Dunn et al. 2012. Analysis of the *Saccharomyces cerevisiae* pan-genome reveals a pool of copy-number variants distributed in diverse yeast strains from differing industrial environments. *Genome Res.* 22, 908-924.  
Galone et al. 2016. Domestication and divergence of *Saccharomyces cerevisiae* beer yeasts. *Cell* 166, 1397-1410.  
Gonçalves et al. 2016. Distinct domestication trajectories in top-fermenting beer yeasts and wine yeasts. *Curr Biol* 26, 2750-2761.  
Legras et al. 2018. Adaptation of *S. cerevisiae* to fermented food environments reveals remarkable genome plasticity and the footprints of domestication. *MBE* 35(7):1712-1727.  
Novo et al. 2009. Eukaryote-to-eukaryote gene transfer events revealed by the genome sequence of the wine yeast *Saccharomyces cerevisiae*. *EC1118*. *PNAS* 106, 16333-16338.  
Peter et al. 2018. Genome evolution across 1,011 *Saccharomyces cerevisiae* isolates. *Nature.* 556:7701: 330.  
Pontes et al. 2019. A quasi-domesticated relic hybrid population of *Saccharomyces cerevisiae* x *S. paradoxus* adapted to olive brine. *Frontiers in Genetics.* 10, 449.  
Strope et al. 2015. The 100-genomes strains, an *S. cerevisiae* resource that illuminates its natural phenotypic and genotypic variation and emergence as an opportunistic pathogen. *Genome Res.* 25, 762-774.  
Zheng, et al. 2012. Genome sequencing and genetic breeding of a bioethanol *Saccharomyces cerevisiae* strain YJS329. *BMC Genomics.* 13, 479.

TROP -Tropical  
TEMP -Temperate  
CHN - China  
FER - Far East Russia  
FG - French Guiana  
MA - Mexican agave fermentation  
MO - Mediterranean oak  
NA & JP - North America and Japan  
PDM - Prise de mousse  
WB - Wild Brazil

F Functional  
NF Not Functional  
x Absent  
✓ Present

✓ *S. cerevisiae*  
✓ *S. paradoxus*  
Unknown

AOY1 INACTIVATIONS

- A811del** adenine deletion at position 881
- V121M** valine to methionine at aminoacid 121
- A822ns** adenine insertion at position 822
- 321 G-A Stop** guanine to adenine at position 321 leads to a premature stop codon
- T435del** thymine deletion at position 498
- T239 del** thymine deletion at position 239
- T230 del** thymine deletion at position 230
- 88 C>T Stop** cytosine to thymine at position 88 leads to a premature stop codon
- A863del** adenine deletion at position 863
- C829ns** cytosine insertion at position 625
- 1178 del** thymine deletion at position 178
- 102bp del** deletion of the first 106 bp

AOY2 INACTIVATIONS

- 11bp del** 11 bp deletion
- T629del** guanine deletion at position 25
- 20bp ins** 20 bp insertion
- 786 G-A stop** guanine to adenine at position 786 leads to a premature stop codon
- 424 C>T Stop** cytosine to thymine at position 424 leads to a premature stop codon
- GT158ns** guanine and thymine insertion at position 158
- G107 del** guanine deletion at position 107
- 135 T>A Stop** thymine to adenine at position 165 leads to a premature stop codon
- 792del** premature stop codon at position 792
- G528del** guanine deletion at position 528

AS I - ASIAN I  
AS II - ASIAN II  
NA - NORTH AMERICAN  
P - RECOMBINANT ASHAA  
EUR - EUROPEAN  
AF I - AFRICAN I  
AF II - AFRICAN II  
SA - SOUTH AMERICAN

Table S2. Presence (+) or absence (-) of the *MEL* gene in the genomes of *S. paradoxus* from different populations.

| STRAIN         | ORIGIN      | POPULATION     | MEL |
|----------------|-------------|----------------|-----|
| DBN13          | Greece      | EUROPEAN       | +   |
| DBN14          | Greece      | EUROPEAN       | +   |
| DBN15          | Greece      | EUROPEAN       | +   |
| TAX15c         | Greece      | EUROPEAN       | -   |
| DBN10          | Greece      | EUROPEAN       | -   |
| TAX3d          | Greece      | EUROPEAN       | -   |
| TAX2           | Greece      | EUROPEAN       | -   |
| PAR10c         | Greece      | EUROPEAN       | -   |
| TAX1a          | Greece      | EUROPEAN       | -   |
| ZP 1157        | Portugal    | EUROPEAN       | -   |
| ZP 1023        | Portugal    | EUROPEAN       | -   |
| ZP600          | Portugal    | EUROPEAN       | -   |
| CET10308       | Spain       | EUROPEAN       | -   |
| ZP 1167        | Spain       | EUROPEAN       | -   |
| ZP 1233        | Spain       | EUROPEAN       | -   |
| MB13a          | France      | EUROPEAN       | -   |
| MB11d          | France      | EUROPEAN       | -   |
| MB15           | France      | EUROPEAN       | -   |
| MB4            | France      | EUROPEAN       | -   |
| Chr116         | France      | EUROPEAN       | -   |
| DBVPG 4650     | Italy       | EUROPEAN       | -   |
| CRO2d          | UK          | EUROPEAN       | -   |
| OAK11c         | UK          | EUROPEAN       | -   |
| CRO12d         | UK          | EUROPEAN       | -   |
| Q59            | UK          | EUROPEAN       | -   |
| Q89            | UK          | EUROPEAN       | -   |
| DBF01          | UK          | EUROPEAN       | -   |
| CBS 406        | Netherlands | EUROPEAN       | -   |
| ZP 614         | Germany     | EUROPEAN       | -   |
| ZP 665         | Germany     | EUROPEAN       | -   |
| EM11           | Germany     | EUROPEAN       | -   |
| EM13           | Germany     | EUROPEAN       | -   |
| EM55           | Germany     | EUROPEAN       | -   |
| EM213          | Germany     | EUROPEAN       | -   |
| NBRC 102004    | Finland     | EUROPEAN       | -   |
| ALKO2639       | Finland     | EUROPEAN       | -   |
| NBRC 102003    | Lithuania   | EUROPEAN       | -   |
| CBS 5829       | Denmark     | EUROPEAN       | -   |
| CBS 432        | Unknown     | EUROPEAN       | -   |
| EXF 6618       | Slovenia    | EUROPEAN       | -   |
| EXF 6641       | Slovenia    | EUROPEAN       | -   |
| EXF 6729       | Slovenia    | EUROPEAN       | -   |
| EXF 6635       | Slovenia    | EUROPEAN       | -   |
| INMIV11        | Ukraine     | EUROPEAN       | -   |
| INMIV544       | Ukraine     | EUROPEAN       | -   |
| ZP 703         | USA         | NORTH AMERICAN | -   |
| YPS 125        | USA         | NORTH AMERICAN | -   |
| YPS 138        | USA         | NORTH AMERICAN | -   |
| YPS 644        | USA         | NORTH AMERICAN | -   |
| UCD-FST 61-248 | USA         | NORTH AMERICAN | +   |
| UCD 51-137     | USA         | NORTH AMERICAN | -   |
| UCD-72-129     | USA         | NORTH AMERICAN | -   |
| UWOPS 1979-129 | Canada      | NORTH AMERICAN | -   |
| UWOPS 1979-527 | Canada      | NORTH AMERICAN | -   |
| UFRJ 50816     | Brazil      | NORTH AMERICAN | -   |
| NRLLY2047      | USA         | NORTH AMERICAN | -   |
| UWOPS 91-917-1 | Hawaii      | HAWAIIAN       | +   |
| CBS 8440       | Russia      | FAR EAST       | -   |
| CBS 8443       | Russia      | FAR EAST       | -   |
| KPN 3829       | Siberia     | FAR EAST       | -   |
| IFO 1804       | Japan       | FAR EAST       | -   |
| UCD-67-570W    | Japan       | FAR EAST       | -   |
| N16            | Russia      | FAR EAST       | -   |
| N43            | Russia      | FAR EAST       | -   |
| N44            | Russia      | FAR EAST       | -   |
| N12            | Azerbaijan  | FAR EAST       | -   |
| ZP 811         |             |                | -   |
| ZP 751         |             |                | -   |
| ZP 838         |             |                | -   |
| DBH58          |             |                | -   |

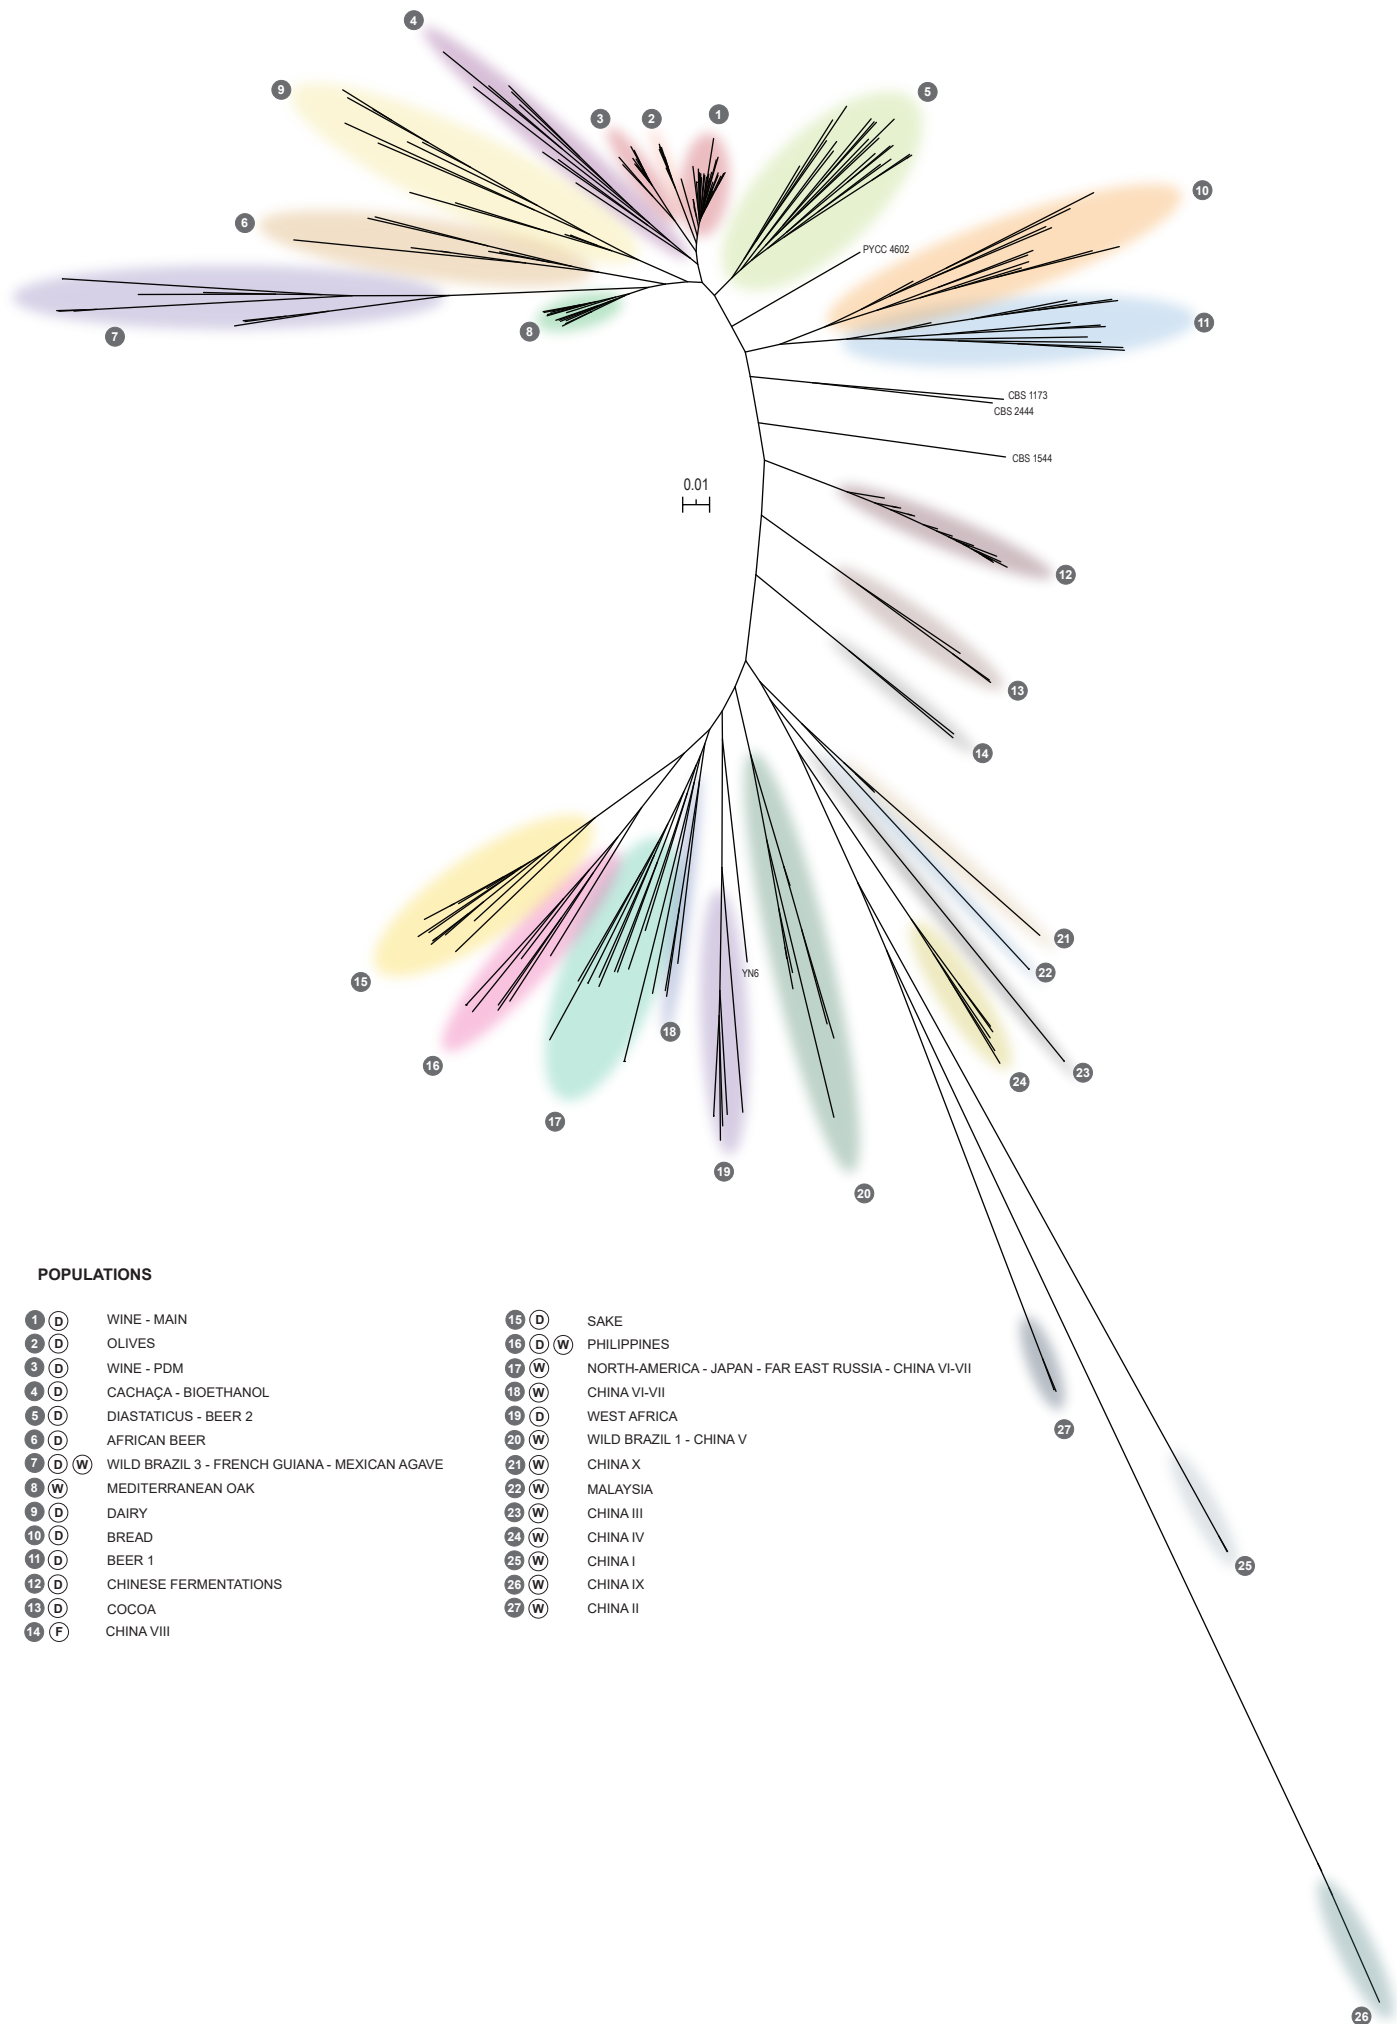

**Figure S1.** Unrooted phylogeny *S. cerevisiae* genomes representing the known diversity of the species. The phylogeny was inferred from 247 sequences and 983.701 SNPs using the TVM+F+G4 model of sequence evolution and the maximum likelihood method as implemented in IQ-TREE. Branch lengths correspond to the expected number of substitutions per site. The 27 clades detected are numbered in gray circles.

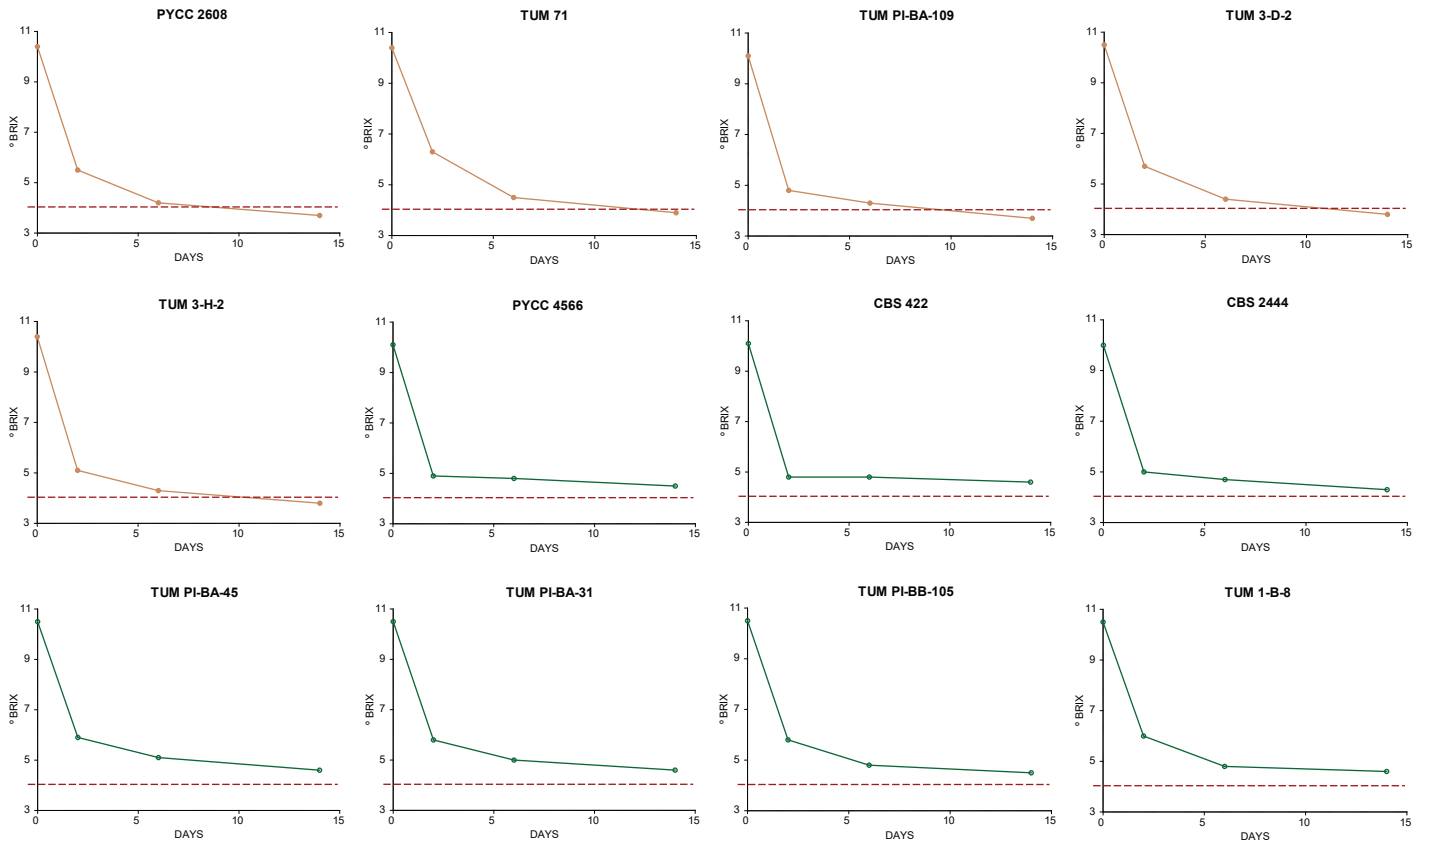

**Figure S2.** °Brix measurements during growth in beer wort for 15 days at 25 °C. Strains able to attenuate the initial 11°Brix of the medium to 4°Brix or lower were considered as diastase positive.

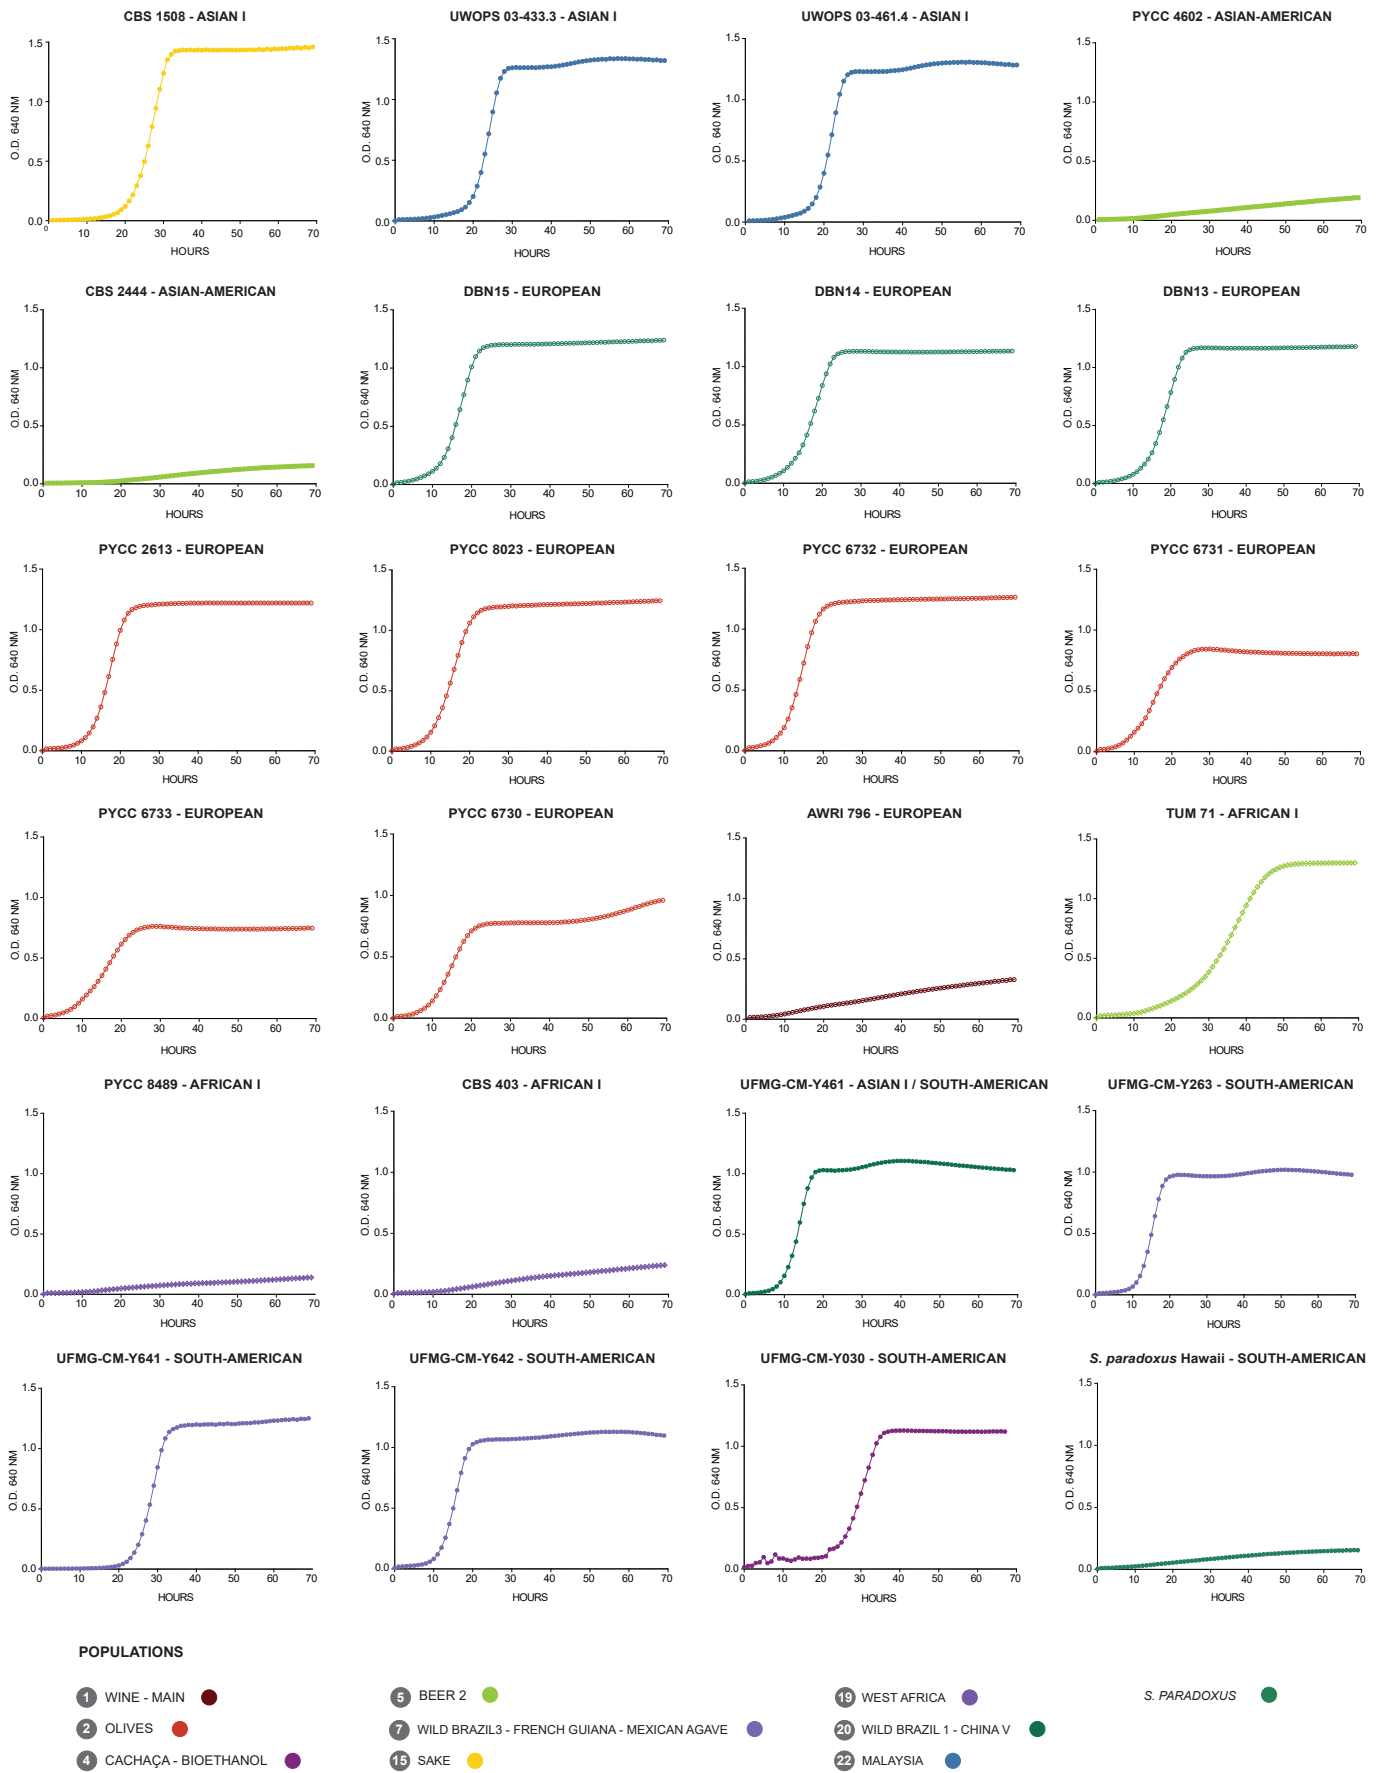

**Figure S3.** Growth curves on 1% (w/v) melibiose medium supplemented with yeast nitrogen base and incubated at 25 °C for three days.
